# Supplementary material for: Construction of Circular RNA–MicroRNA–Messenger RNA Regulatory Network of Recurrent Implantation Failure to Explore Its Potential Pathogenesis
Source: Front Genet. 2021 Feb 16;11:627459. doi: 10.3389/fgene.2020.627459 (PMC7924221; doi:10.3389/fgene.2020.627459)
Supplement: Supplementary Table 1 — 13 DECs were obtained GSE147442 microarray by the limma package in RStudio software. DECs differentially expressed circRNAs. [file Data_Sheet_1.CSV]

	logFC	AveExpr	t	P.Value	adj.P.Val	B	v	g	name
hsa_circ_0092337	2.13519317934574	7.40660106758792	3.96066022374849	0.000976488789963276	0.0163016188710071	-0.638383913515575	3.01033273802388	up	hsa_circ_0092337
hsa_circ_0004121	2.08953513932457	6.1836826474491	3.32157925171754	0.00395194517996734	0.0248651016609407	-1.94300887874858	2.40318908842723	up	hsa_circ_0004121
hsa_circ_0034642	2.01647659995824	5.08321191791846	3.29586729332717	0.00417937411477079	0.0254416755598406	-1.99492589008038	2.37888875144351	up	hsa_circ_0034642
hsa_circ_0001568	2.8221907483645	5.77767018213115	3.10406174764548	0.00633382021780017	0.0302667449997225	-2.37959742171765	2.19833426801264	up	hsa_circ_0001568
hsa_circ_0034762	2.11471081609265	5.06213964515019	2.92166224130582	0.00937183097458302	0.0361975220777051	-2.74004265584512	2.02817555271142	up	hsa_circ_0034762
hsa_circ_0027612	-2.16615232635583	7.74809091271816	-4.4116204011377	0.000365396549020395	0.0129353602674364	0.283285973811827	3.43723555864872	down	hsa_circ_0027612
hsa_circ_0003069	-2.0120211699392	8.47301104130372	-4.2882411892048	0.00047766845755067	0.013722973131969	0.0319605298920234	3.32087343605383	down	hsa_circ_0003069
hsa_circ_0013181	-2.06971882922447	8.80490433318753	-4.04718838346402	0.00080810565705835	0.0154754197241634	-0.461042903691648	3.09253185299083	down	hsa_circ_0013181
hsa_circ_0058161	-2.11883559417547	7.49847531474487	-3.84853468447528	0.00124822145301547	0.0177420231594774	-0.868255928572922	2.90370835752971	down	hsa_circ_0058161
hsa_circ_0033392	-2.42786994978463	8.22517943180959	-3.54216249405817	0.0024416882875142	0.0213069806024428	-1.49506727483933	2.61230978005261	down	hsa_circ_0033392
hsa_circ_0030162	-2.06198388843858	8.53530308605024	-3.45512948279969	0.00295336870824911	0.0226638081573833	-1.67228705258021	2.52968233090077	down	hsa_circ_0030162
hsa_circ_0039697	-2.1117196817886	8.9860134864828	-3.15685197408138	0.00565085859139478	0.0287279544917808	-2.27423189998342	2.24788556046804	down	hsa_circ_0039697
hsa_circ_0001713	-2.05903326412667	8.10640621734036	-2.70821838311499	0.0147341339745229	0.045833798240188	-3.15307379631233	1.83167538551062	down	hsa_circ_0001713
